# Supplementary material for: The complete mitochondrial genome of the grooved carpet shell, Ruditapes decussatus (Bivalvia, Veneridae)
Source: PubMed Central journal article supplement (PMC5571815; doi:10.7717/peerj.3692), 2017-08-22
Supplement: peerj-05-3692-s004.pdf [file peerj-05-3692-s004.pdf]

| Sample ID | Analysis                                        | GenBank Accession | Data Availability                                                                                                     |
|-----------|-------------------------------------------------|-------------------|-----------------------------------------------------------------------------------------------------------------------|
| F3        | Sanger sequencing of LUR                        | MF055702          | GenBank                                                                                                               |
| F4        | Sanger sequencing of whole mitochondrial genome | KP089983          | GenBank                                                                                                               |
| F5        | Sanger sequencing of LUR                        | MF055703          | GenBank                                                                                                               |
| F7        | Sanger sequencing of LUR                        | MF055704          | GenBank                                                                                                               |
| F9        | Sanger sequencing of LUR                        | MF055705          | GenBank                                                                                                               |
| F10       | Sanger sequencing of LUR                        | MF055706          | GenBank                                                                                                               |
| F11       | Sanger sequencing of LUR                        | MF055707          | GenBank                                                                                                               |
| F13       | Sanger sequencing of LUR                        | MF055708          | GenBank                                                                                                               |
| F15       | Sanger sequencing of LUR                        | MF055709          | GenBank                                                                                                               |
| F16       | Sanger sequencing of LUR                        | MF055710          | GenBank                                                                                                               |
| F17       | Sanger sequencing of LUR                        | MF055711          | GenBank                                                                                                               |
| F19       | Sanger sequencing of LUR                        | MF055712          | GenBank                                                                                                               |
| F20       | Sanger sequencing of LUR                        | MF055713          | GenBank                                                                                                               |
| F21       | Sanger sequencing of LUR                        | MF055714          | GenBank                                                                                                               |
| fRDI01    | <i>De novo</i> assembly of mtDNA; SNP           | PRJNA170478       | <a href="https://doi.org/10.6084/m9.figshare.4970762.v3">https://doi.org/10.6084/m9.figshare.4970762.v3</a> ; GenBank |
| fRDI02    | <i>De novo</i> assembly of mtDNA; SNP           | PRJNA170478       | <a href="https://doi.org/10.6084/m9.figshare.4970762.v3">https://doi.org/10.6084/m9.figshare.4970762.v3</a> ; GenBank |
| fRDI03    | <i>De novo</i> assembly of mtDNA; SNP           | PRJNA170478       | <a href="https://doi.org/10.6084/m9.figshare.4970762.v3">https://doi.org/10.6084/m9.figshare.4970762.v3</a> ; GenBank |
| fRDI04    | <i>De novo</i> assembly of mtDNA; SNP           | PRJNA170478       | <a href="https://doi.org/10.6084/m9.figshare.4970762.v3">https://doi.org/10.6084/m9.figshare.4970762.v3</a> ; GenBank |
| fRDI05    | <i>De novo</i> assembly of mtDNA; SNP           | PRJNA170478       | <a href="https://doi.org/10.6084/m9.figshare.4970762.v3">https://doi.org/10.6084/m9.figshare.4970762.v3</a> ; GenBank |
| fRDI06    | <i>De novo</i> assembly of mtDNA; SNP           | PRJNA170478       | <a href="https://doi.org/10.6084/m9.figshare.4970762.v3">https://doi.org/10.6084/m9.figshare.4970762.v3</a> ; GenBank |
| mRDI01    | <i>De novo</i> assembly of mtDNA; SNP           | PRJNA170478       | <a href="https://doi.org/10.6084/m9.figshare.4970762.v3">https://doi.org/10.6084/m9.figshare.4970762.v3</a> ; GenBank |
| mRDI02    | <i>De novo</i> assembly of mtDNA; SNP           | PRJNA170478       | <a href="https://doi.org/10.6084/m9.figshare.4970762.v3">https://doi.org/10.6084/m9.figshare.4970762.v3</a> ; GenBank |
| mRDI03    | <i>De novo</i> assembly of mtDNA; SNP           | PRJNA170478       | <a href="https://doi.org/10.6084/m9.figshare.4970762.v3">https://doi.org/10.6084/m9.figshare.4970762.v3</a> ; GenBank |
| mRDI04    | <i>De novo</i> assembly of mtDNA; SNP           | PRJNA170478       | <a href="https://doi.org/10.6084/m9.figshare.4970762.v3">https://doi.org/10.6084/m9.figshare.4970762.v3</a> ; GenBank |
| mRDI05    | <i>De novo</i> assembly of mtDNA; SNP           | PRJNA170478       | <a href="https://doi.org/10.6084/m9.figshare.4970762.v3">https://doi.org/10.6084/m9.figshare.4970762.v3</a> ; GenBank |
| mRDI06    | <i>De novo</i> assembly of mtDNA; SNP           | PRJNA170478       | <a href="https://doi.org/10.6084/m9.figshare.4970762.v3">https://doi.org/10.6084/m9.figshare.4970762.v3</a> ; GenBank |
