# Supplementary material for: The complete mitochondrial genome of the grooved carpet shell, Ruditapes decussatus (Bivalvia, Veneridae)
Source: PubMed Central journal article supplement (PMC5571815; doi:10.7717/peerj.3692), 2017-08-22
Supplement: peerj-05-3692-s005.pdf [file peerj-05-3692-s005.pdf]

| Primer     | Direction | Sequence 5'-3'                  | amplified | Lenght(bp) |
|------------|-----------|---------------------------------|-----------|------------|
| ATP6-1     | F         | ATTTGTGCTTCTTTTCAGTGTACTTTT     | 1517 bp   | 27         |
| ATP6-1     | R         | TCATCCCAATTACTAGAATAAAACAGG     |           | 27         |
| ATP6-3     | F         | TAAGTGGTTGGTTCCTTAATGTT         | 1321 bp   | 24         |
| ATP6-3     | R         | AACTTTAATAGGGGAGTTCTTCG         |           | 23         |
| ATP6-4     | F         | TTAAGGAAACGGTGTCTTATTTTTG       | 1379 bp   | 25         |
| ATP6-4     | R         | CTAGGAAAACAGATCACTGACAAGA       |           | 25         |
| ATP6-5     | F         | TTAGTTTGGTTGGGGTAATAATAAGG      | 1479 bp   | 26         |
| ATP6-5     | R         | GTTAGCACAAATACAACCTACCACCAT     |           | 26         |
| ATP6-6     | F         | TATAGATTGAAATCAGTTGGGTTTTTC     | 1259 bp   | 27         |
| ATP6-6     | R         | TCAACTACCCTAGATATCCTTTACTGC     |           | 27         |
| CYTB-1     | F         | GATCATATAAACCGTAAGCGAATAATG     | 1433 bp   | 27         |
| CYTB-1     | R         | ATATCTAGCAACTAACCCAACCCTAAT     |           | 27         |
| ATP8-2     | F         | GGCGTGTAGATGAATAGATTTTTA        | 1255 bp   | 26         |
| ATP8-2     | R         | CTCTAAAGAAGGGATCACACCATAA       |           | 26         |
| ND6-1      | F         | TAAATGTAATAAGGCGCTATAATCACC     | 1242 bp   | 28         |
| ND6-1      | R         | TATTTCTGCCACCCTAACAAAATAAAG     |           | 27         |
| COX3-2     | F         | TTAAATTAACCTTAACCAACGAAATAGG    | 1285 bp   | 29         |
| COX3-2     | R         | TAATTGCAATTTGCTTTTTATTAAGTGA    |           | 29         |
| ATP8-ND6   | F         | GCTTTAGGGTGTTCGATCACTCAGGA      | 1323 bp   | 27         |
| ATP8-ND6   | R         | AAACGCCCCCGTAAAAGCTAAGAACAC     |           | 27         |
| ATP6-CYTB  | F         | AGTTGTGTGGATCTGGCCACAGAGAAA     | 1300 bp   | 27         |
| ATP6-CYTB  | R         | TACCTGGGAAACCCCCATTATTCGCTT     |           | 27         |
| ND6COX3    | F         | ATGGCGTAATGGAGGGTGTACGATTTT     | 1218 bp   | 27         |
| COX3ATP6   | R         | CACCGGCCATTTAGAAATTCAGGCA       |           | 26         |
| CYTB-2     | F         | TCTGTGTTCAAAAATGTACAGCATAAT     | 1318 bp   | 27         |
| CYTB-2     | R         | CTTTCTTTTTCAGAGACAAGCAACTT      |           | 26         |
| ATP6-2R    | F         | ATTAATAGTAGGTTGGGATGGTTTAGG     | 1501 bp   | 27         |
| ND6COX3-R1 | R         | AAATCGCCCCGGCGTTCTTGAATACTGA    |           | 27         |
| ATP62R     | F         | TTCATGTAATTTTAGGAATTTGCTTTC     | 2283 bp   | 27         |
| COX3-R1    | R         | AAATCGCCCCGGCGTTCTTCTTGAATACTGA |           | 30         |
| ATP6-3R    | F         | AACTTTAATAGGGGAGTTCTTCG         | 1729 bp   | 23         |
| ND6COX3-R1 | R         | AAATCGCCCCGGCGTTCTTGAATACTGA    |           | 28         |
| ATP6-3R    | F         | AACTTTAATAGGGGAGTTCTTCG         | 2028 bp   | 23         |
| COX3-R1    | R         | TTCATGTAATTTTAGGAATTTGCTTTC     |           | 27         |

|            |   |                             |         |    |
|------------|---|-----------------------------|---------|----|
| ATP6CYTB-F | F | AGTTGTGTGGATCTGGCCACAGAGAAA | 1418 bp | 28 |
| CYB-R1     | R | ATATCTAGCAACTAACCCAACCCTAAT |         | 28 |
| ATP6-5     | F | TTAGTTTGGTTGGGGTAATAATAAGG  | 2076 bp | 26 |
| ATP6-6     | R | TCAACTACCCTAGATATCCTTTACTGC |         | 28 |
| NewATP8    | F | AAGGGGAGGTAGCGAGAAAA        | 729 bp  | 20 |
| NewND4     | R | GGCAACGAGGAACCTACAGT        |         | 20 |
| New16S     | F | GTGACACGGTGGATTATTGCTT      | 1256 bp | 22 |
| NewATP6    | R | AAACCCCATCACACAAACACAC      |         | 22 |
| NewCYTB1   | F | TGGGTACATGTCCCGTAGAAGA      | 870 bp  | 22 |
| New16S     | R | TATGAACGCCTTACCCTATCCC      |         | 22 |
| NewND5     | F | TGGGGCTCTTCAATAGCTGT        | 1731 bp | 21 |
| NewATP8    | R | GCAAGCAAGAGGAGCAAAC         |         | 20 |
| NewCR-F3   | F | TGTAGAAATAGGCTGAATTCGAGG    | 1188 bp | 24 |
| NewCR-F4   | R | ATAACTTTTGC GGCCCTTAGTC     |         | 22 |
| NewCR-F4   | F | TTGTGATAACTGCTAGGGTGGT      | 1529 bp | 22 |
