# Supplementary material for: The complete mitochondrial genome of the grooved carpet shell, Ruditapes decussatus (Bivalvia, Veneridae)
Source: PeerJ journal article supplement (doi:10.7717/peerj.3692), 2017-08-22

# Supplementary Figure 1- mitochondrial tRNA structures of *Ruditapes decussatus*

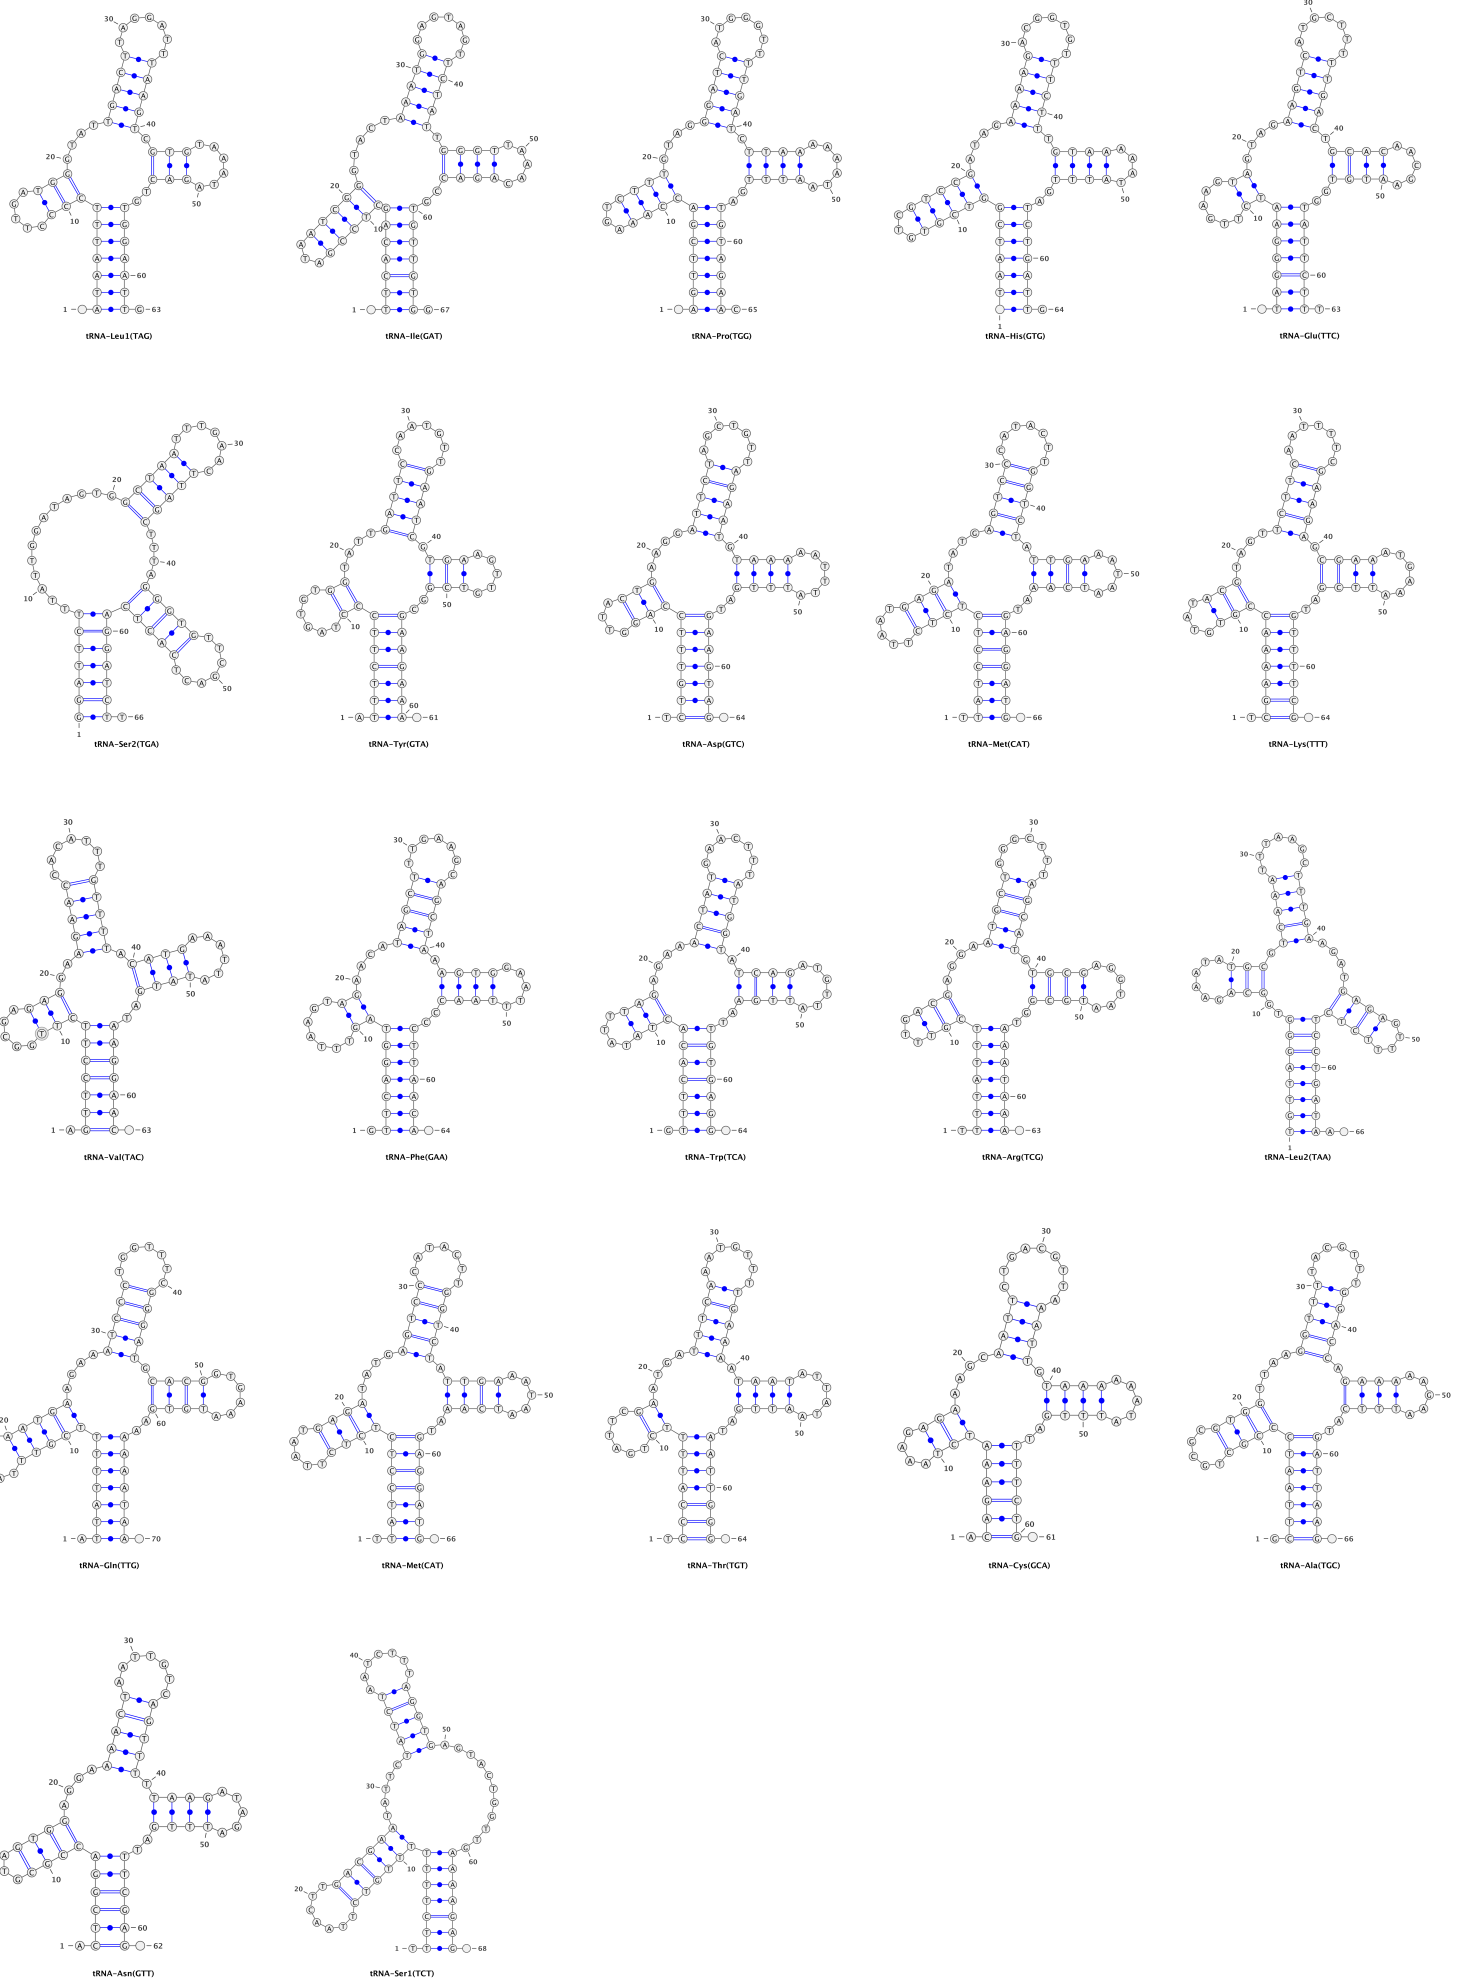

Supplement: Suppl_Fig1.pdf [file Suppl_Fig1.pdf]
